# Supplementary material for: Interferon-α exacerbates neuropsychiatric phenotypes in lupus-prone mice
Source: PubMed Central journal article supplement (PMC6724270; doi:10.1186/s13075-019-1985-9), 2019-09-03

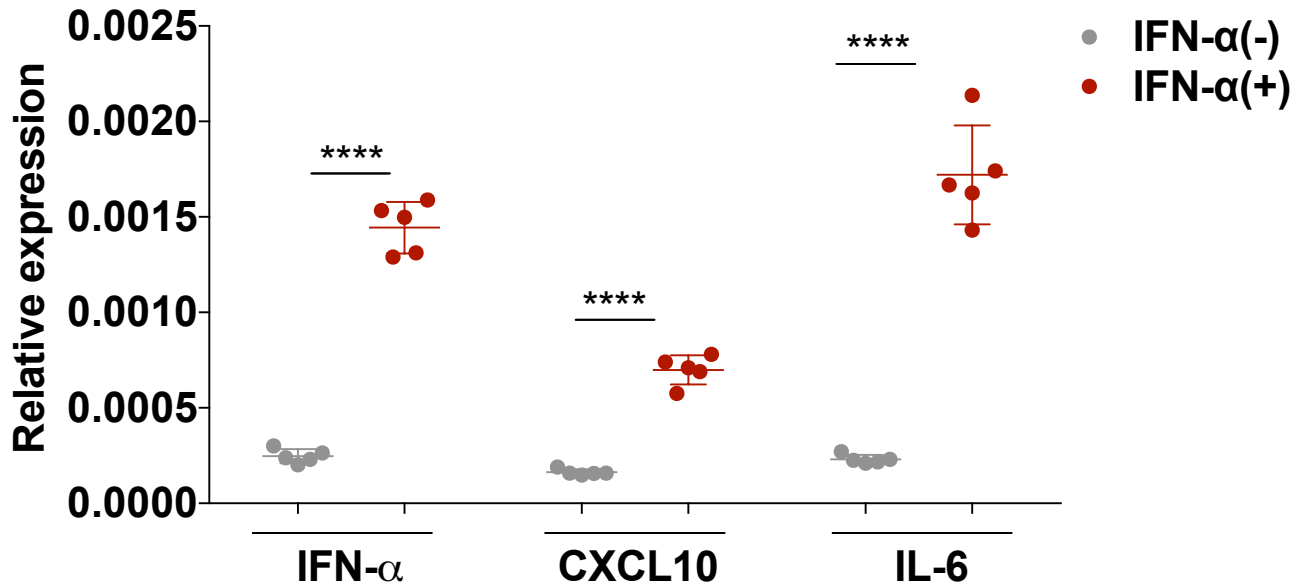

Supplement: 13075_2019_1985_MOESM2_ESM.pdf [file 13075_2019_1985_MOESM2_ESM.pdf]
